# Supplementary material for: WNT-FRIZZLED-LRP5/6 Signaling Mediates Posterior Fate and Proliferation during Planarian Regeneration
Source: Genes (Basel). 2021 Jan 15;12(1):101. doi: 10.3390/genes12010101 (PMC7830089; doi:10.3390/genes12010101)
Supplement: Supplementary file 1 [file genes-12-00101-s001.zip › Pascual_Sureda_20201231_Table_S2.xlsx]

## Sheet: TS 1
Species	Abbrebiation	Gene name	Accession Numbers	Sequence
Amphimedon queenslandica	Aque	lrp5/6	NP_001266230.1	MLTGDAMSEAVRKHSRLRPPLSILASLLVVLLSLNSLDASSIIYFANQSSIDRLVDNVAVPVIQVGTKPLSLDCNSCDDRIYWSTDHTIMRSFANSSTIETILSVSLGRPQGVAIDWRSNLIYYTGTRTGETQGYVGVASCSGSYQRIFTNLTPRDPGPVAVDPLHGFMFFADTYCCIWRANLDGSNPTKIIENLNDIRDISVDAINSTLYWNALGVIYKSNLSGGDQEMVLPSLSDTTSLSATNDTLYLSRRRNGQNGSLYSYSFGLLNTVVEGSSFDPGDISAFLPKSFLMSVSGGCSSINGGCSKFCFTLPDPSSPSDISTQSTCSCPTGFKLNADNQSCNTVPQLFLLIGQSSFINILSFDVEGEELPLPLPFHGNGETIEFVTYDRKFEYLYWS…
Branchiostoma floridae	Bflo	lrp5/6	XP_002597607.1	MARAGLLLLGSLCAAFQVALPNPRLLFANRRDVRIIDAGPGRGHNSTVVVSNLEDAAALDFIYDQNVIYWTDVSLEMIKMIYTNGSGIVTDVISTGLVSPDGLACDWIGRKLYWTDSETNRIEVSNLDGTSRKVLFWEELDQPRAIALDPARGYMFWTDWGEVPKIERAGMDGTGRRVVVDDNIYWPNGLTLDYAELRLYWADAKLQLIHYANFDGSERRAVVEGSLPHPFALTLYGDTIYWTDWQTNSIHSCHKISGEDKQVIHSEIFSPMDIHAYMPARQLMRHTNPCQPNNGGCSHLCLMSPDAPNYRCACPTGVKLLDDERTCADGASEILLLARRTDLRRISLDTPDYTDVVLQIDDIRHAIAIDYDVVEGFVYWTDDEARAIRRARLDGSEVE…
Branchiostoma floridae	Bflo	vldlr partial	XP_035698345.1	RTCSDSEFTCDDSKCIPSRWQCDGDNDCADGSDEKPDICNQRTCRSDHFSCEENGGGICIPRTWVCDRDADCENGRDEEGCDQLTCDPTEHTCDNGKCITVRWVCDQDNDCGDNSDEKNCPTPTCSTNEFMCNNSYCIPRRWLCDGDFDCLDLSDEKDCPSVPPGTECSSREFTCSNRDCVHISWKCDGDEDCADGSDEVDCVRQCSEDEFQCDNGLCIAGPLQCDGKRDCDDGSDERHDCQPIISCDPTKEFECVNSQTGVREKCIPFSKVCDGNDDCSDGSDEPGQHVCNVDECAVNNGSCMEGCVNTPHSYYCTCNDGFDLQDDGRTCKDKDECAIFGTCSQLCENTHGGYKCECVDGYTLDPRNGYCKADGEEAKLIFANRRDLRMIDMATGEYT…
Ciona intestinalis	Cint	lrp6	XP_018671032.1	MKLLFISFLYFLSSNASKDTALNAPFLLLANHVDIRLIPSGEPNNTVIVASDLKGALACDFFFEEQHIYWIDCLNGRIQYVDMTTPQRKKMDVLVSGMVKPEGLACDWIGRKLYWTDRGTKRIEVSELDGSHRKVLLWNNLDLPRAIAVDPHNRYMYWTDWGEEPKIERSGMDGSQREVLINQNIYWPNGITLDYEEGKVYWIEAGHHFIHRINLDGSQRXVXWVGALEHPYAITLFRDRVYWSDWRTSSLYSISKNQTEVPRLVKGDILSPMDLQAYNSQRQKPGPNPCGSTNGGCSHLCLLSPKPPYYKCACPTGVQIMKDRKTCKHGPDQILLLARRTDIRMISLDTDDHTDVLLPVKTVLNAVTVDYDPVDKFVYWTDEDRKAILRCHLNGTGSE…
Crassostrea gigas	Cgig	lrp6	XP_034330203.1	MLFILVFLGVIYTSSAKPYLLLANRLDVQLIDAAYSANSTIVQNGLEDAAALDFCYKDKSVFWTDVSLAKIKRTWIERPKNAEDIIRQGLVSPDGLACDWIAEKLYWADSETNRLEVSNLNGSFRSVLFWEELDQPRAIALDPLTGWMFWTDWGEVPKIERAGMDGDRKTRSIIIDKNIHWPNGLTIDYADNKIYWADAKVKYIASCDYDGKNHREVVAGEKILSHPFALTLSDRTLFWTDWQERSIFSCDKITGSNIRPIMENIYSPMDIHVFSASRQPSRPDRHPCTINNGGCSHLCLISPKKPFFACACPTGVKLLNKTTCAKGVEQLLLLARRRDIRKISLDMPDHTDVVLPLNEIKHAIAIDYDPVEDQVYWTDDEVRAIKRAYLDGTGEEVVI…
Crassostrea gigas	Cgig	vldlr	XP_011443917.2	MNILFHSPLIFVYALICLSHYTYSETATGQPLTCEENQFKCMHRCIPISWRCDGDYDCVDEDDKTDEENCPSRTCPEDEFTCKSGHCVPMRWTCDKETDCLDGSDETDICQNKSCTMDQFSCGNGECIPASWRCDGSPDCANGHDENCTSPTCASDEFRCDNSKCVNNKWRCDGDDDCGDKSDEKSCAPLTCTAEEFQCADKQCIDQLWYCDGDPDCNDQSDESNCTTSNTTICSSETEWQCRTGEQCIHSSWKCDNDEDCLDGSDEVDCNPTCRPDQFKCDSGDCVYVTLKCDGYIDCVDGSDESNCSKTEKCPSNKFDCYNNGSVCIEPTKLCDTRMDCDNYADEENSLCETNSTTSGRKKFDNACKYNNGGCMQTCIPIDKTNRRCECLHGFRLNG…
Danio rerio	Drer	lrp6	NP_001128156.1	MGAVLQTLLLCTLCLQIRGLPLLLYANRRDLRLVDAAHGRANATLVMGGLEDAAAVDYIYAQGLIYWSDVSEESIKRTLFNGSAPSGVQTTVISGLASPDGLACDWMGNKLYWTDSETNRIEVAELDGTHRKVLFWQDLDQPRAIALDPGRGFMYWTDWGEIPKIERAGMDGSLRSVIVETEIYWPNGLTLDYQQQQLYWADAKFNCIHRSNLDGSSREVVVKGSLPHPFALTLYEDTLFWTDWNTHSIHSCHKHTGENSREVHSNIFSPMDIHVYSQQRQPMDVASPCSVRNGGCSHLCLLSPAKPYYQCACPTGVQLLEDHKSCRDGGPSQLLLLARRTDLRRISLDTPDFTDIVLQAEDIRHAIAIDYDPVEGHIYWTDDEVRAIRRSLLDGSDAQ…
Danio rerio	Drer	lrp5	XP_009296098.1	MELKPGALAMEILLLELLLCCSLTVIRGSPLLLFANRRDVRLVDVEVGRSESAVVVSDLEDAAAVDFLFSEGLIFWTDVSEEAIKQTYYNLSTNSMKEATLGKGQTVVVSGLDSPDGLACDWLGHKLYWTDSETNRIEVANLDGTSRKVLFWQDLDQPRAIALNPSHRYMYWTDWGEEPRIERAGMDGSNRQIIVQKQIYWPNGLTIDLDEQKLYWADAKLSFIHRANLDGTSREAVVEGSLTHPFALTLYDETLYWTDWQTRSIHACNKHSGEKHREILNGIYSPMDIQVLGQERQPNIQTPCSERNGGCSHLCLLSPIPPFYSCACPTGVKLKEDGKTCRPGAEQVLLLARRTDLRRISLDLPDFTDIVLQVNDIRHAIAIDYDPVEGYVYWTDDEL…
Drosophila melanogaster	Dmel	arrow	AAF91072.1	MALEPYTKSAEIEPQLCQVIDNNEDVTTKATKCVKSNSGVGWRQMLIGFLLICFGISNSWQYKNVHMPSSSSLIASPPASAFVNTPATLLFTTRHDIQVANITRPTGGPQIDVIVRDLAEAMAIDFYYAKNLVCWTDSGREIIECAQTNSSALQPLLRAPKQTVISTGLDKPEGLAIDWYTDKIYWTDGEKNRIEVATLDGRYQKVLFWTDLDQPRAVAVVPARKLLIWTDWGEYPKIERASMDGDPLSRMTLVKEHVFWPNGLAVDLKNELIYWTDGKHHFIDVMRLDGSSRRTIVNNLKYPFSLTFYDDRLYWTDWQRGSLNALDLQTRELKELIDTPKAPNSVRAWDPSLQPYEDNPCAHNNGNCSHLCLLATNSKGFSCACPTGVKLISANTCAN…
Homo sapiens	Hsap	lrp6	NP_002327.2	MGAVLRSLLACSFCVLLRAAPLLLYANRRDLRLVDATNGKENATIVVGGLEDAAAVDFVFSHGLIYWSDVSEEAIKRTEFNKTESVQNVVVSGLLSPDGLACDWLGEKLYWTDSETNRIEVSNLDGSLRKVLFWQELDQPRAIALDPSSGFMYWTDWGEVPKIERAGMDGSSRFIIINSEIYWPNGLTLDYEEQKLYWADAKLNFIHKSNLDGTNRQAVVKGSLPHPFALTLFEDILYWTDWSTHSILACNKYTGEGLREIHSDIFSPMDIHAFSQQRQPNATNPCGIDNGGCSHLCLMSPVKPFYQCACPTGVKLLENGKTCKDGATELLLLARRTDLRRISLDTPDFTDIVLQLEDIRHAIAIDYDPVEGYIYWTDDEVRAIRRSFIDGSGSQFVVT…
Homo sapiens	Hsap	lrp5	AAC36467.1	MEAAPPGPPWPLLLLLLLLLALCGCPAPAAASPLLLFANRRDVRLVDAGGVKLESTIVVSGLEDAAAVDFQFSKGAVYWTDVSEEAIKQTYLNQTGAAVQNVVISGLVSPDGLACDWVGKKLYWTDSETNRIEVANLNGTSRKVLFWQDLDQPRAIALDPAHGYMYWTDWGETPRIERAGMDGSTRKIIVDSDIYWPNGLTIDLEEQKLYWADAKLSFIHRANLDGSFRQKVVEGSLTHPFALTLSGDTLYWTDWQTRSIHACNKRTGGKRKEILSALYSPMDIQVLSQERQPFFHTRCEEDNGGCSHLCLLSPSEPFYTCACPTGVQLQDNGRTCKAGAEEVLLLARRTDLRRISLDTPDFTDIVLQVDDIRHAIAIDYDPLEGYVYWTDDEVRAIRR…
Nematostella vectensis	Nvec	lrp6	XP_032221447.1	MVCDIGKGGLQVLLQLVLLLRSSRGETFIFFSNASNINKLEPNSTTITPVIFNLDSAVALDVDVRDRRIYWSDTRTKAIKRAQIDGTFIEDIITTNIGVCDGLAIEWRTRRIYWTDRTYRFIQVATLDGSRRHVLISSGLDKPRGIAVHPQAGLMFWTDWGENPKIERARLDGQKRQEIVTSNIGWPNSIAVDYAANRLFWVDAIRDSLESSDLDGRARRTLFRQPGLQPFGVSILGKHVYWSDWASEGIHMNRMGTGKLEKSVYNVGNMPMGVAVFDKSRQPPGNNTCSKQNGGCSYLCLPSATGTQCACPWESLLSSDNKSCAKASEIFMLVSDPEIPAIYKIYLDVPNHNRGVLSVNETTDITYDHFEDRIYWIDGAQRNIHRAYMNMTEHEQFGM…
Nematostella vectensis	Nvec	vldlr	XP_032241245.1	MSLLGPKVETFLAFLILVNLCGIFTTNAASSGFHCSHGQFECVSDQKCIVLRWRCDGEDDCSDGSDEQGCAPKTCLQDQFTCRNGKCIQATWKCDGEDDCRDGYRSDESNCGNVTCGADEFMCSNRKCISRSWTCDNQDDCGDNSDEDRNGVCKSVQRTCASNQFTCSNGDCISNSWTCDGDNDCNDGSDEKESLCASKSCKITEFTCRTSRRKCIPSQWKCDGDNDCPDSSDESGCPTASVSPRRCSVGMFKCRNGECVLGHWRCDGEKDCSDGSDEKGCRKSNCASSEFTCANGQCIPSSQRCDGTSNCRDSSDEKACVTPPPCMPGEFKCQSTGRCIPESKVCDGTRDCQDGEDEPLRCNIDECKDHNGHCSQKCNDLTLGYNCSCFSGYKLQGAR…
Octopus bimaculoides	Obim	lrp6	XP_029642293.1	MDTFFNFYLLNTLFWSCFGSPLLLFANRKDVRLVDAADSQNSSVIISGLEDAAAVDFFYAENSVFWTDVSLEMIKRTYINGSQTSTNVITFGLLSPDGLALDWLGKKLYWTDSETNRIEVSNLNGSFRKILFWENLDQPRAIALDPLNGYMYWTDWGERPKIERAGMDGNKLNRSVIISEDIHWPNGLTLDYDDSKIYWADAKLNFIHSCNFDGSDRRPVVEGSLPHPFALTLFEETLFWTDWHTRAIYSCDKRTGNNKEVVHSDIFSPMDIHVYTAKRQPSKINPCGHNNGGCSHLCLMSPQAPFYSCACPTGIRIHENGQTCPGSPKEILLLARRSDLRRISLDTPDYTDVILQLNDIQHTIAIDYDPVEDYVYWTDDNIHLIRRAHMDGSGQEIVV…
Octopus bimaculoides	Obim	vldlrp	XP_014782275.1	MKLLSHLFSYYFILTFLTLFIFLQATSAVTPDCDSNKFNCGDGTCIALNALCDSFEDCDNGSDEHNCFNATCGPTESSCDNGQCIPQKWVCDEEIDCNDRSDENPKTCAERKCPDDHFSCENGLCITVDWLCDGQNDCPNGLDEKNCVQDKCLAKEFRCSNGDCINNGWVCDGENDCVDESDEKGCEPRTCQPDEFECDTHTCINPSWICDGDGDCSDNTDENNCTTISNECTSLDFICKNEICITKSWKCDGDEDCLDGSDEVDCTHTCDNDHFLCEESKECLHKLLKCDGSVDCESGSDEKDCGSSGNTCTDRTFDCYGDKKKCIPWNKVCDFRNDCGNWQDENDELCQEKYPCKDDNGGCQQQCISLRHMHRCDCLAGYKLVGNSSCQDVDECEIF…
Saccoglossus kowalevskii	Sko	lrp5/6	XP_006815762.1	MDRSIVITTLLIAQFMTACVCQDTKLLYTDALNAALYFQSKLWSFSYDDDGLYQRLQAEQTVERNVLHDGVSEIKITLAYDFEDEFVFWPDIIRRTINKMSLKSGEVSVLFEGISDGVAGIEVDWVANNVYWSDADYNWIMMCDYNGTYHHTLLKTGIVEPGDIAVDAVNGMLYWADMNSDDPRIESSTLSGENRTTIIAKNNYLVYPHGLTLDHWQKRIFYTDLWLEGLFSVSVTGNVSDIRVEYVDGGLYYPYYVDLSKDYFFISEFHYQEIVVVPRNNSSVESALIYPLGDAIPLGISYFDSARQPTTSNPCSENNGGCDQLCVSATDNTHQCLCTYGYIKQEDVTSQCYKDDHLIPGHKIILANETSICVAPSHLGDLSDLSEALRCVFDVDVTS…
Schistosoma mansoni	Sman	lrp	XP_018655061.1	MFGLYSATNFLCILFLLQTYSQRIQVIYEGQNVAFYCNATGGSKNDYIHYQWEVNNRDLIATDAYFHIRGIQKSDEGEYKCIATQYVNGTPIVATESTFISVRKADSIITQDVEEGILVRILCNVSSDEKPDGAGPFRYEWRNPNGTLVGTQWKLELGHIKVHESGIYVCRVSYEFDKRQMSTSSATKINVIPRAGVIFPGIRGNVLEVLETGDILQECQVVSAKPSQYNFQWFGPDGRLISNSAFLQRDYITRQRDEGIYRCVASPVEEGRLQVENSLIVTTAPLRFQITTLEEDLNIGGFTHRRIILVDSSKPNLTTRETFIYQWLDTEMNPILDSMGPDLRINFHSPSDFGRYSVRITGLNSGYQRDLSTYITLDGRNGEVEPTYSVVIREISGPL…
Schmidtea mediterranea	Smed	ldlr	AQT19775.1	MKYLLISCLVISIVCVVSSQYYKRCRRFQFLCQNGKCIPETLHCDGHDNCGDNSDEICDHRETFTCSDSNIILKTELCDGKADCDNDEDPKICVQNKCSIDQFMCRTKPMNCISKTSLCNHNNDCSDGSDESPEACEIINKPLVVQCDNSIHFQCENKQLCISRIYYCDGKSDCSDQSDEKNCPDSENSKSKSQSLADLVKQSTICQNNEFYCGAGSTVPCIAKEWRCDGSYDCPETYKDELNCSNFECSPDKPNRCKTIDSCYDNDQRCDGYPDCTDNSDEEFCSNPSQHNVSCDPFNEFKCVKNNTCIAFQRVCDKTNDCGDGSDERPGGKSENCDKNLCKINNGNCEQKCINFYSHRKCLCKPGYRIDSINETKCIDIDECADHMVCSHKCANYLG…
Schmidtea mediterranea	Smed	vldlr	AQT19789.1	MLILDLLLGLILYDVVLGNENCTSSDYLNCEDINAVNCISKDWWCDGNQDCESGKDESNCPPKVCLENEFLCHSGTQCIPKLLLCDGTFHCVDKSDERNCTKHEIKSCDSISQFDCNKDGEICIPISEVCDKKNNCGRNQDEEPGNSVDNCQRNDCKLIPNGGCSHFCTNFFTYIKCHCPLGYKLQPDNRTCVDIDECSASPSKCNQICKNTPGSYECSCYDGYRQNQHNSEYCITKEGDRSILITLNGGRQLMIDLNTGSHFYKPLYNSHESLVNIDVDLHQSPQTMFWIQQSNGKLGQSKIDLKVNNIEKYRFLNHKNLSDDHIGQLCTDMSFDWLRGLLFWTSSIEKIIYVTNTTSNVTSVLLNQGLENPRSIAVDPINTGVYWIDLGTKKSSPRI…
Schmidtea mediterranea	Smed	lrp5/6	BK014290	MIRTIIIVFLYASYHVLSKSILHRHGVDIFFNTDLKLLAADVFLSRKLYVFVIQENGKSLLKTANFSKLDRRKMRDVLKFPVQSAESVAVDWVSGNLYWADQKNQFIEVVDLNVDSDFPISRERRRILLSRNMADIHSLVVDPWEQYLFWLQIGAIMVLERSRLDGSDRRVIHKSILFKSSQLAIDRHRKMLFWWGLDGEIHRVDYQGQTGCSMRVQGTWKQWSPTFLTFTEGKLVFINDEQLWVSSFECGTGISIALKTNPNIAPIAIISRKHQLMVPRGRRKSPCMNRVCSSICLPIVDSAYRCSCSTGITEPINNAVCPTFPTRSLFIGNPPKIYHMSLDGGLQPPLELLSENAGIPFRFAYDSVTSSLLYVDFNSSSIFSLDLNKYGTPQRFYLD…
Xenopus tropicais	Xtro	lrp6	XP_031754428.1	MGALLRSLLICSLSCLLRASPLLLYANRRDLRLVDAAGMKGNSTVVVSGLEDAAAVDFVFFRGLIYWSDVSEEAIKRIDFNKTGSSHDVVISGLLSPDGLACDWLGEKLYWTDSETNRIEVSNLDGSLRKVLFWQELDQPRAIALDPTRGYMYWTDWGDVPKIERAGMDGSLRSVIIDSDIYWPNGLTLDYDEQKLYWADAKLSFIHKANLDGSHRQTVIKGSLAHPFALTLFGDTIYWTDWTTRSILACNKYTGEDRREVDSDIFSPMDIHVFSRLRQPNATNPCAVHNGGCSHLCLMSPMEPFYQCACPTGVRLMEDGKMCMHGATELLLLVRRTDLRRISLDTPDFTDIVLPLDDIRHAIAIDYDPVEGYIYWTDDEVRAIRRTQIDGSSSQYIVT…
Xenopus tropicais	Xtro	lrp5	XP_002941689.1	MGILPGVSLLFCYCLASSWGSPLLLFANRRDVRLVDAGGTKLESVVVVSGLEDAAAVDFLYSQGVIYWTDVSEESIKQTLYNQSSNLQTVVISGLVSPDGLACDWIGKKLYWTDSETNRIEVGNLNGTYRKVLFWQDLDQPRAIALDPAHGYMYWTDWGDTPRIERAGMDGSMRKVIVDTDIYWPNGLTIDLDEQKLYWADAKLSFIHRANLDGSFRQKVVEGSLTHPFALTLAGDTLYWTDWQTRSIHACNKRTGEKRREILSSLYSPMDIQVFSKERQPYFPTPCDESNGGCSHLCLLSPREPFYSCTCPTGVQLTQDGKTCKTGADDVLLLARRTDLRRISLDMPDFTDIVLQIDDIRHAIAIDYDPVEGYIYWTDDEVKAIRRAYLDGSGAQTLV…

## Sheet: TS 2
	5' to 3'
name	Fw	Rv	Technique	vector
fzd1	TCACGAGTCTATCGGGAGAAAT	AAAGCTCAAATTCAGGCTTCTG	dsRNA/ISH	pSPARK
fzd4-1	GTCCAGTTCAATGCCCATGATAA	AAAGCCCCAAAGAACTTTGTTGT	dsRNA/ISH	pSPARK
lrp5/6	GTGGCAACCTGTATTGGGC	ATAACAGTTCCAATGGCGGC	ISH	pSPARK
lrp5/6	AACTCTCCTCTTGTCCTGGC	TGAGTGCCATCAAGCCAGTA	dsRNA	pCRII
wnt1	AACACCAGATGGTGGCATTT	CCATTCGGGTTTTGAATCAC	ISH	pSPARK
wnt1	CTGCAACCGACCTTTCCTAA	GAAGCCCTGATAAAACAAGCAA	dsRNA	pCRII
wnt11-2	GCTATGCTATGCATGGTGTGTTGA	CGTCTGGCGATTTCGAACAATAAT	dsRNA	topo4
slit	ATCAGTTCGACAAGGGGATT	GATTGTTTGGGGAACACTGG	ISH	pSPARK
notum	ATTGAATGATCCGCAATCCA	TACAAACGTTCGCTGCAATG	ISH	pSPARK
